# Supplementary material for: Nano–Liposomes Double Loaded with Curcumin and Tetrandrine: Preparation, Characterization, Hepatotoxicity and Anti–Tumor Effects
Source: MDPI journal article supplement (doi:10.3390/ijms23126858), 2022-06-20
Supplement: s1 [file s1]

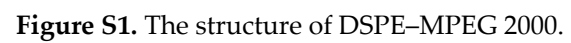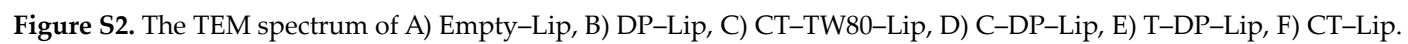

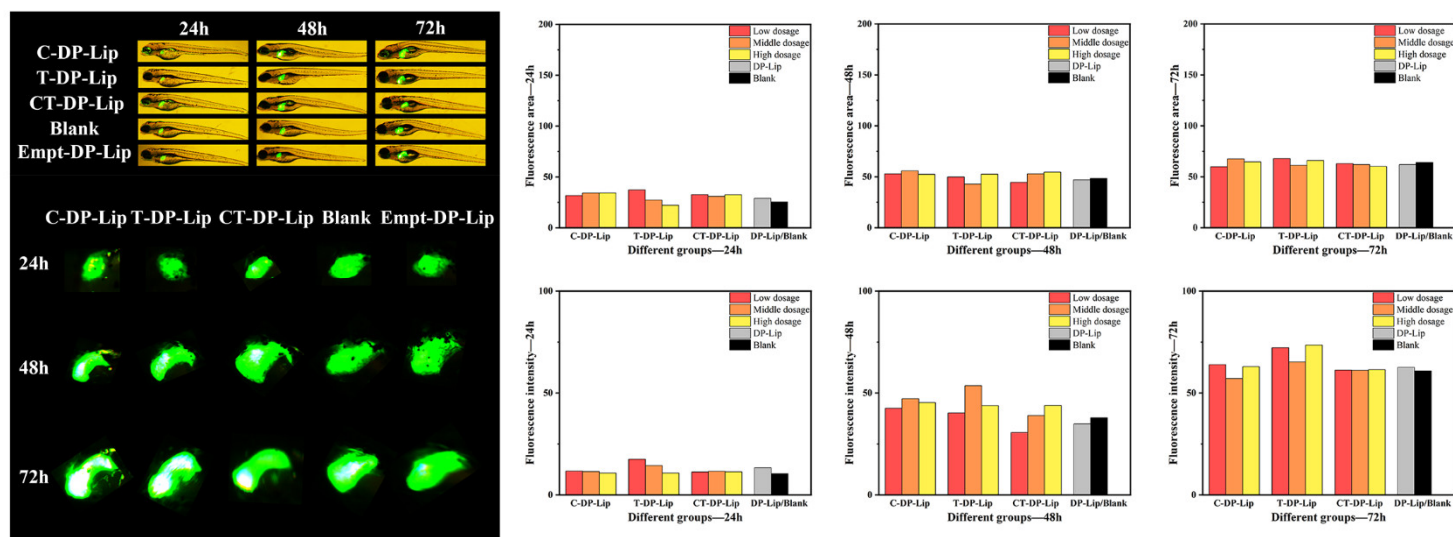

**Figure S3.** The fluorescence area and intensity of zebrafish liver of CT-DP-Lip, C-DP-Lip, T-DP-Lip and DP-Lip groups in different time periods.

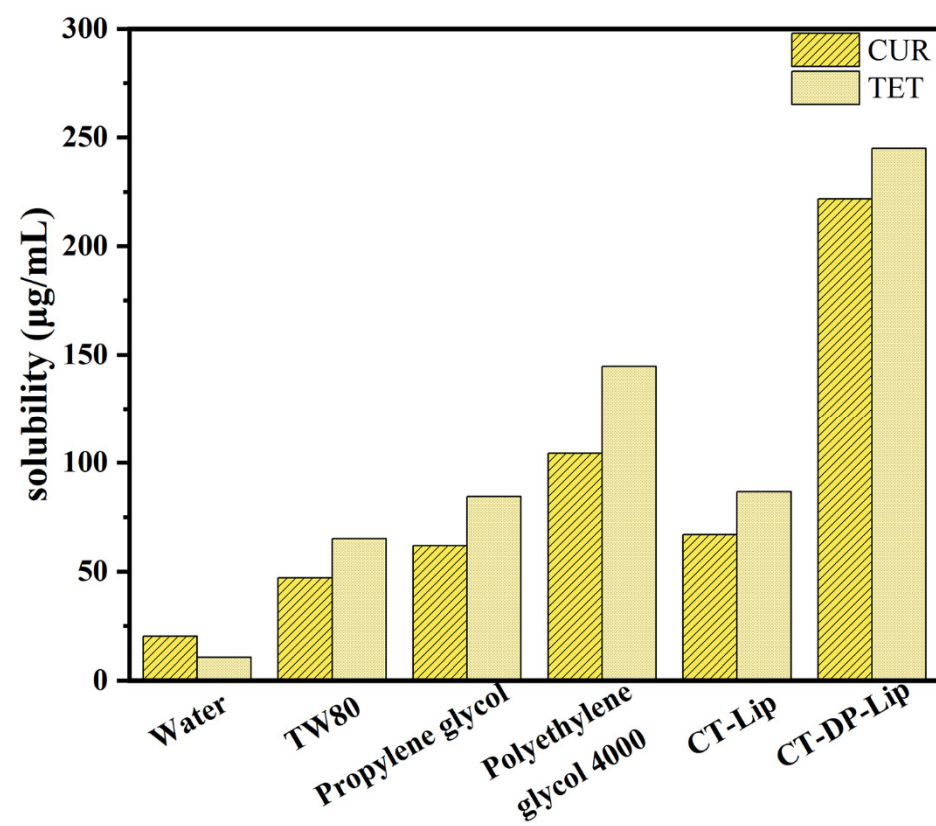

Figure S4. The solubility of CUR and TET in different solvents.

**Table S1.** The results of particle size, PDI, zeta potential, transmittance and turbidity of liposomes in each group

| Name         | Mean particle size (nm) | PDI (%)          | Zeta potential (mV) | Conductivity ( $\mu\text{s}/\text{cm}$ ) | Transmittance (%) | Turbidity ( $\text{cm}^{-1}$ ) |
|--------------|-------------------------|------------------|---------------------|------------------------------------------|-------------------|--------------------------------|
| CT-DP-Lip    | 111.65 $\pm$ 1.34       | 21.59 $\pm$ 2.60 | -30.45 $\pm$ 4.15   | 14.85 $\pm$ 0.86                         | 83.94 $\pm$ 0.62  | 0.175 $\pm$ 0.007              |
| CT-TW80-Lip  | 127.49 $\pm$ 4.07       | 15.32 $\pm$ 2.48 | -9.13 $\pm$ 6.90    | 152.53 $\pm$ 2.63                        | 76.94 $\pm$ 0.11  | 0.262 $\pm$ 0.001              |
| CT-Lip       | 255.74 $\pm$ 23.70      | 26.74 $\pm$ 1.47 | 1.95 $\pm$ 0.62     | 123.16 $\pm$ 6.37                        | 0.47 $\pm$ 0.01   | 5.351 $\pm$ 0.016              |
| C-DP-Lip     | 138.08 $\pm$ 2.77       | 21.83 $\pm$ 2.10 | -47.97 $\pm$ 0.95   | 17.33 $\pm$ 0.58                         | 78.03 $\pm$ 0.12  | 0.25 $\pm$ 0.001               |
| T-DP-Lip     | 98.58 $\pm$ 1.24        | 23.30 $\pm$ 0.60 | -21.73 $\pm$ 0.23   | 44.33 $\pm$ 0.58                         | 71.67 $\pm$ 0.06  | 0.33 $\pm$ 0.001               |
| Empty-DP-Lip | 77.85 $\pm$ 3.64        | 14.81 $\pm$ 1.53 | -33.10 $\pm$ 3.43   | 10.16 $\pm$ 0.40                         | 86.08 $\pm$ 0.65  | 0.150 $\pm$ 0.008              |
| Empty-Lip    | 187.88 $\pm$ 5.40       | 23.98 $\pm$ 1.88 | -21.21 $\pm$ 1.01   | 122.73 $\pm$ 3.06                        | 11.13 $\pm$ 0.35  | 2.196 $\pm$ 0.031              |

Note: Data are the mean  $\pm$  standard deviation of three replicates.

**Table S2.** The encapsulation efficiency and loading content of CUR and TET in CT-Lip and CT-DP-Lip

| Name      | EE (%)           |                  | LC (%)          |                 |
|-----------|------------------|------------------|-----------------|-----------------|
|           | CUR              | TET              | CUR             | TET             |
| CT-DP-Lip | 81.02 $\pm$ 2.70 | 89.51 $\pm$ 1.78 | 1.89 $\pm$ 0.06 | 2.09 $\pm$ 0.04 |
| CT-Lip    | 48.91 $\pm$ 0.42 | 62.76 $\pm$ 1.01 | 1.14 $\pm$ 0.01 | 1.47 $\pm$ 0.04 |

Note: Data are the mean  $\pm$  standard deviation of three replicates.

**Table S3.** The effect of the proportion of DP on drug-carrying liposomes

| DP Proportion (%) | Mean particle size (nm) | PDI (%)      | Zeta potential (mV) |
|-------------------|-------------------------|--------------|---------------------|
| 5                 | 289.07 ± 23.45          | 26.40 ± 0.35 | −9.10 ± 6.89        |
| 10                | 272.27 ± 5.25           | 26.57 ± 4.76 | −20.63 ± 0.72       |
| 15                | 255.37 ± 16.75          | 23.27 ± 1.36 | −21.20 ± 1.04       |
| 20                | 127.49 ± 4.07           | 15.33 ± 2.48 | −20.20 ± 0.70       |
| 30                | 111.64 ± 1.34           | 21.59 ± 2.60 | −16.35 ± 2.92       |
| 50                | 97.41 ± 2.21            | 14.87 ± 0.23 | −33.10 ± 3.46       |

Note: Data are the mean ± standard deviation of three replicates.

**Table S4.** The IC<sub>50</sub> values of CT-DP-Lip, C-DP-Lip, T-DP-Lip, CUR and TET in MDA-MB-231 cell lines *in vitro* (μM)

| Groups           | DP-Lip | CUR    | TET   | C-DP-Lip | T-DP-Lip | CT-DP-Lip |
|------------------|--------|--------|-------|----------|----------|-----------|
| IC <sub>50</sub> | NS     | 19.103 | 1.120 | 12.426   | 3.764    | 0.692     |

Note: NS indicates that there is no obvious cytotoxicity and IC<sub>50</sub> cannot be calculated.
